# Supplementary material for: Ultrasonic Film Rehydration Synthesis of Mixed Polylactide Micelles for Enzyme-Resistant Drug Delivery Nanovehicles
Source: MDPI journal article supplement (doi:10.3390/polym14194013), 2022-09-25
Supplement: s1 [file s1]

## Supplementary Materials

for

# Ultrasonic Film Rehydration Synthesis of Mixed Polylactide Micelles for Enzyme-Resistant Drug Delivery Nanovehicles

Darya A. Stepanova<sup>1</sup>, Vladislava A. Pigareva<sup>1</sup>, Anna K. Berkovich<sup>1</sup>, Anastasia V. Bolshakova<sup>1,2</sup>,  
Vasiliy V. Spiridonov<sup>1</sup>, Irina D. Grozdova<sup>1</sup> and Andrey V. Sybachin<sup>1,\*</sup>

Differential scanning calorimetry measurements were performed using Netzsch DSC 204 F1 (Germany) at heating rate 10 °C/min. The samples of PLAMs were lyophilized prior measurements and 2 mg of samples were used. For the PLA-NH<sub>2</sub> and PLA-PEG samples no additional manipulations prior DSC measurements were made. The results were analyzed using software supplied by manufacturer.

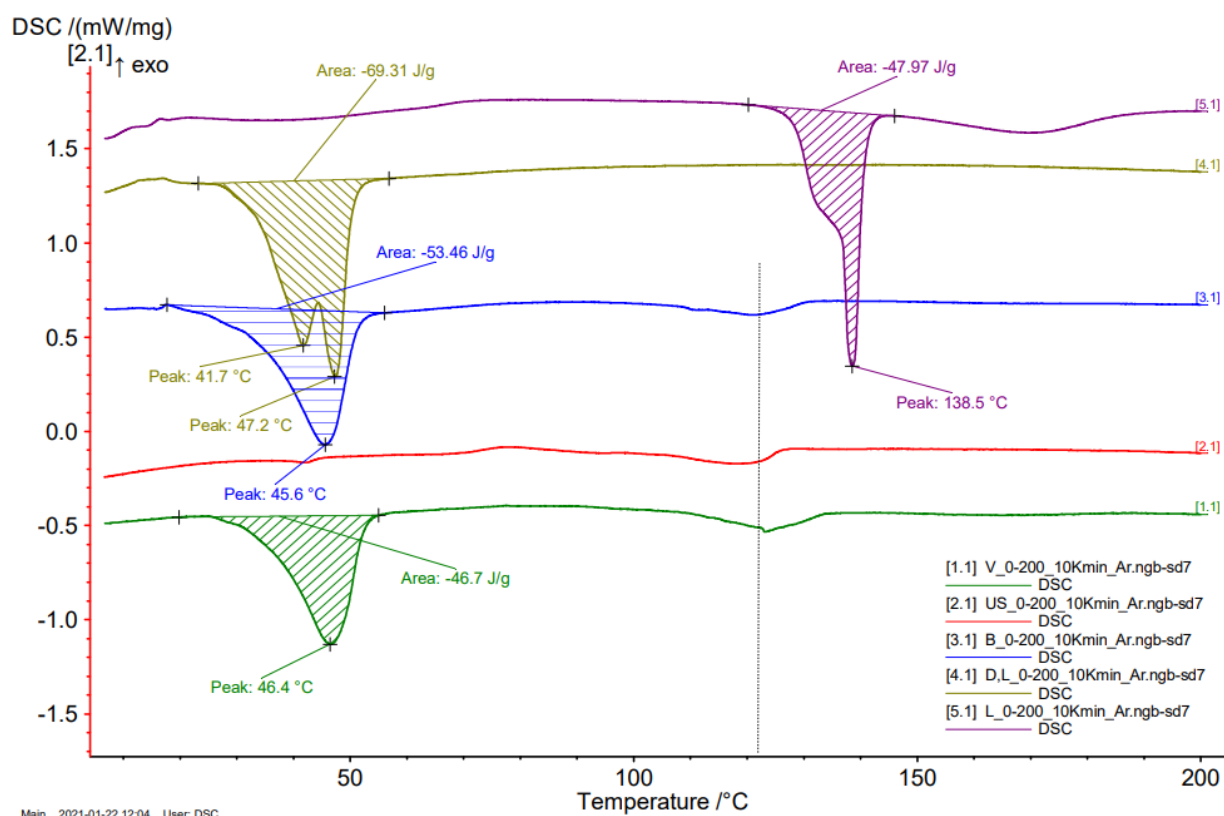

**Figure S1.** DSC curves for PLAMs-v (1.1); PLAMs-us (2.1); PLAMs-sb (3.1); PLA-PEG (4.1); PLA-NH<sub>2</sub> (5.1). Heating rate 10 °C/min.

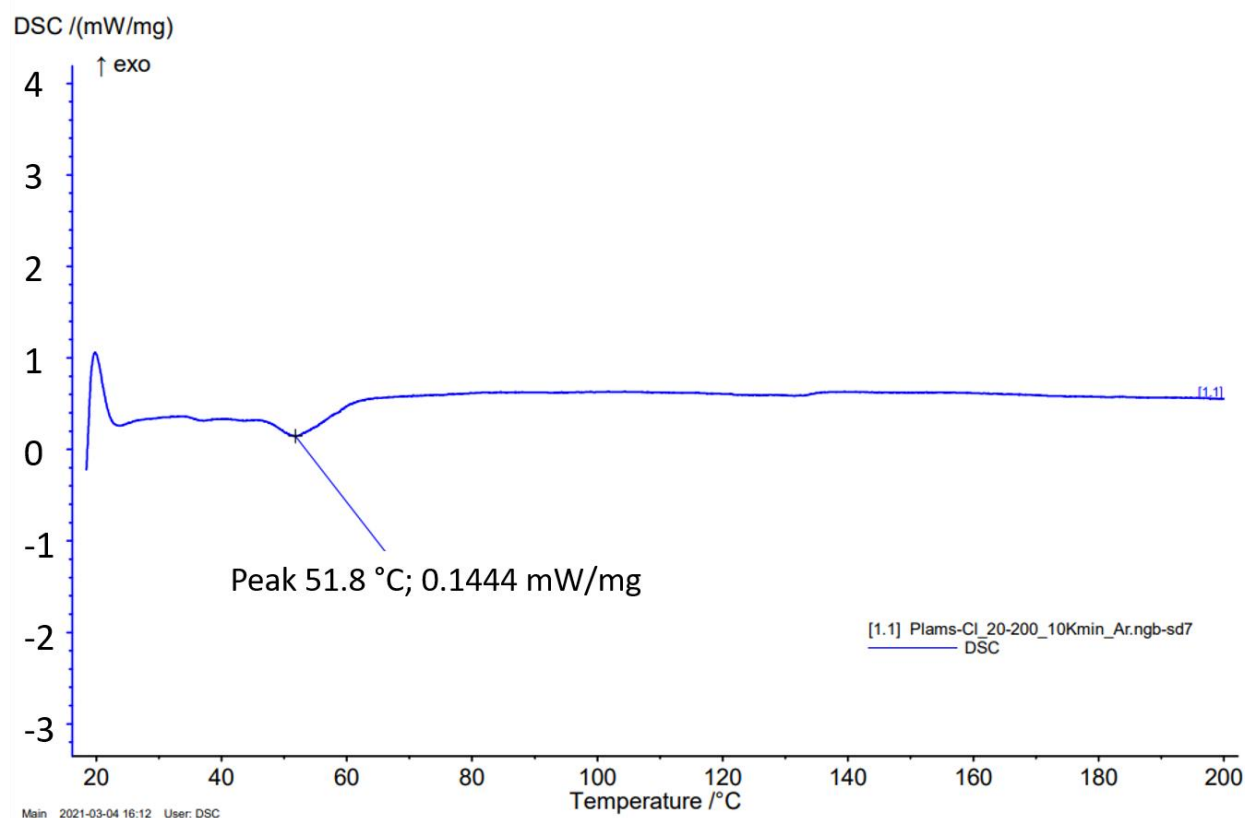

**Figure S2.** DSC curve for PLAMs-cl. Heating rate 10 °C/min.

IR-spectra of samples were obtained using Carl Zeiss Jena Specord M-80 IR (Germany). The 20  $\mu$ l droplet of PLAMs suspension with concentration 1 mg/ml was deposited between two KBr glasses and the spectrum was recorded in absorption regime in wavelength range from 400 to 2000  $\text{cm}^{-1}$ .

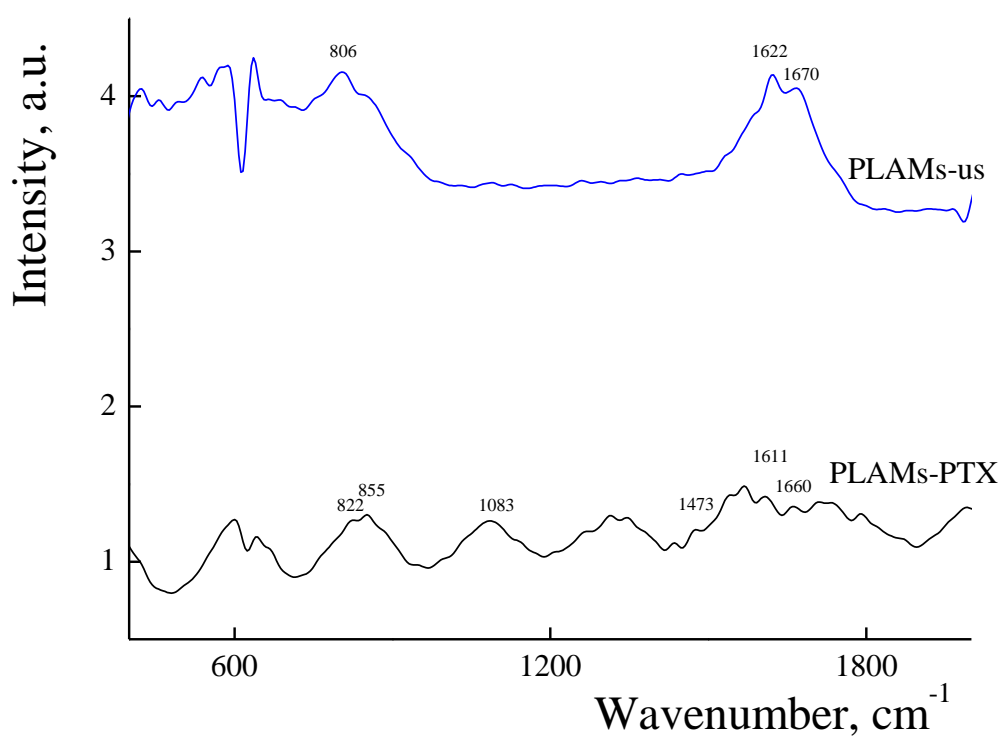

**Figure S3.** IR-spectra of PLAMs-us and PLAMs-PTX.

The hydrodynamic diameters of PLAMs were obtained by dynamic light-scattering using Brookhaven ZetaPlus (Brookhaven, USA) equipment and DynaLS software package for size distribution analysis

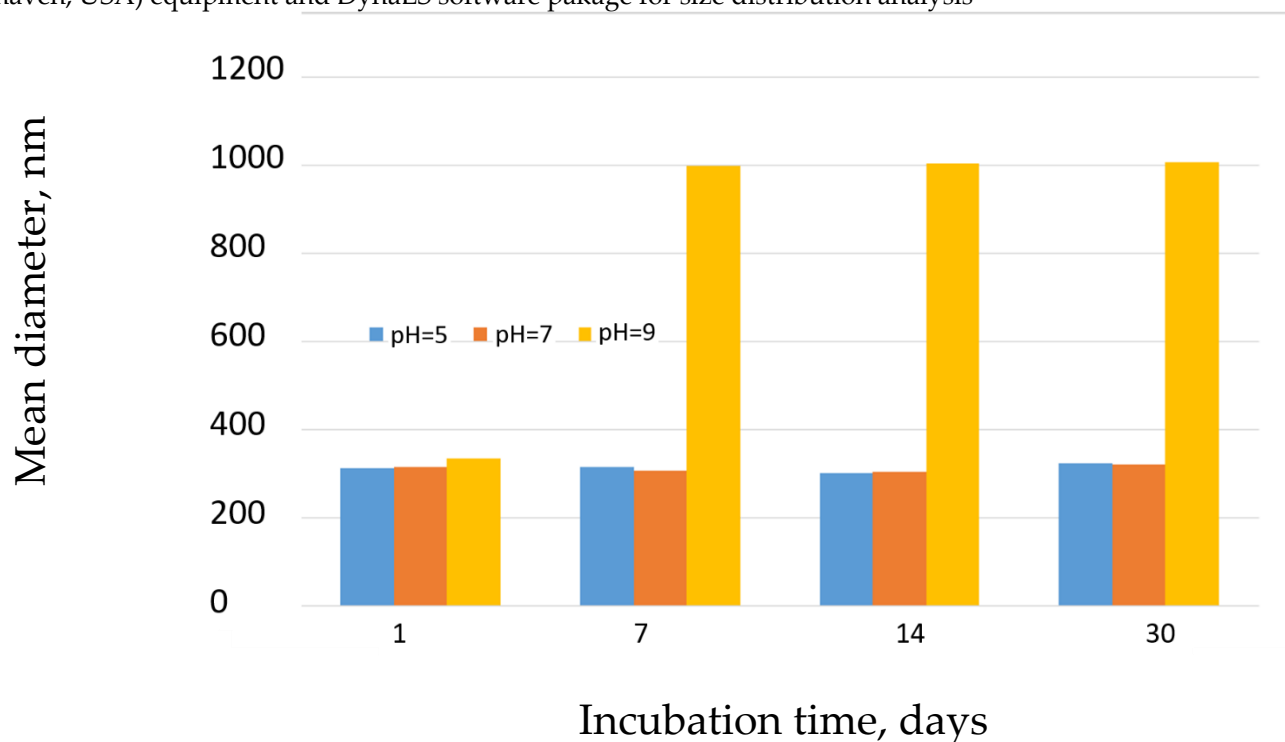

**Figure S4.** Time dependence of hydrodynamic diameters of PLAMs-us in buffers with pH = 5 (blue), pH = 7 (red) and pH = 9 (yellow). PLAMs-us concentration 0.5 mg/ml.

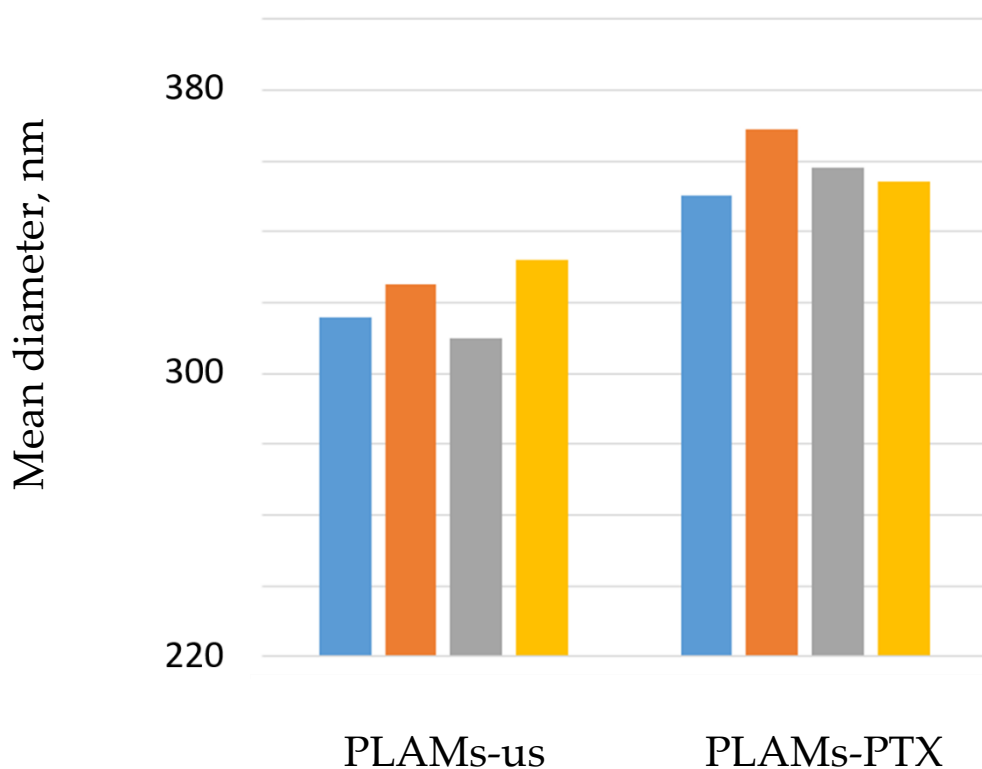

**Figure S5.** Time dependence of hydrodynamic diameters of PLAMs-us and PLAMs-PTX in buffer with pH = 7 at 7 days (blue), 14 days (red), 21 day (grey), 30 days (yellow). PLAMs-us and PLAMs-PTX concentrations 0.5 mg/ml.
